# Supplementary material
Source: PubMed Central journal article supplement (PMC33129)
Supplement: pnas_081077298_1.pdf [file pnas_081077298_1.pdf]

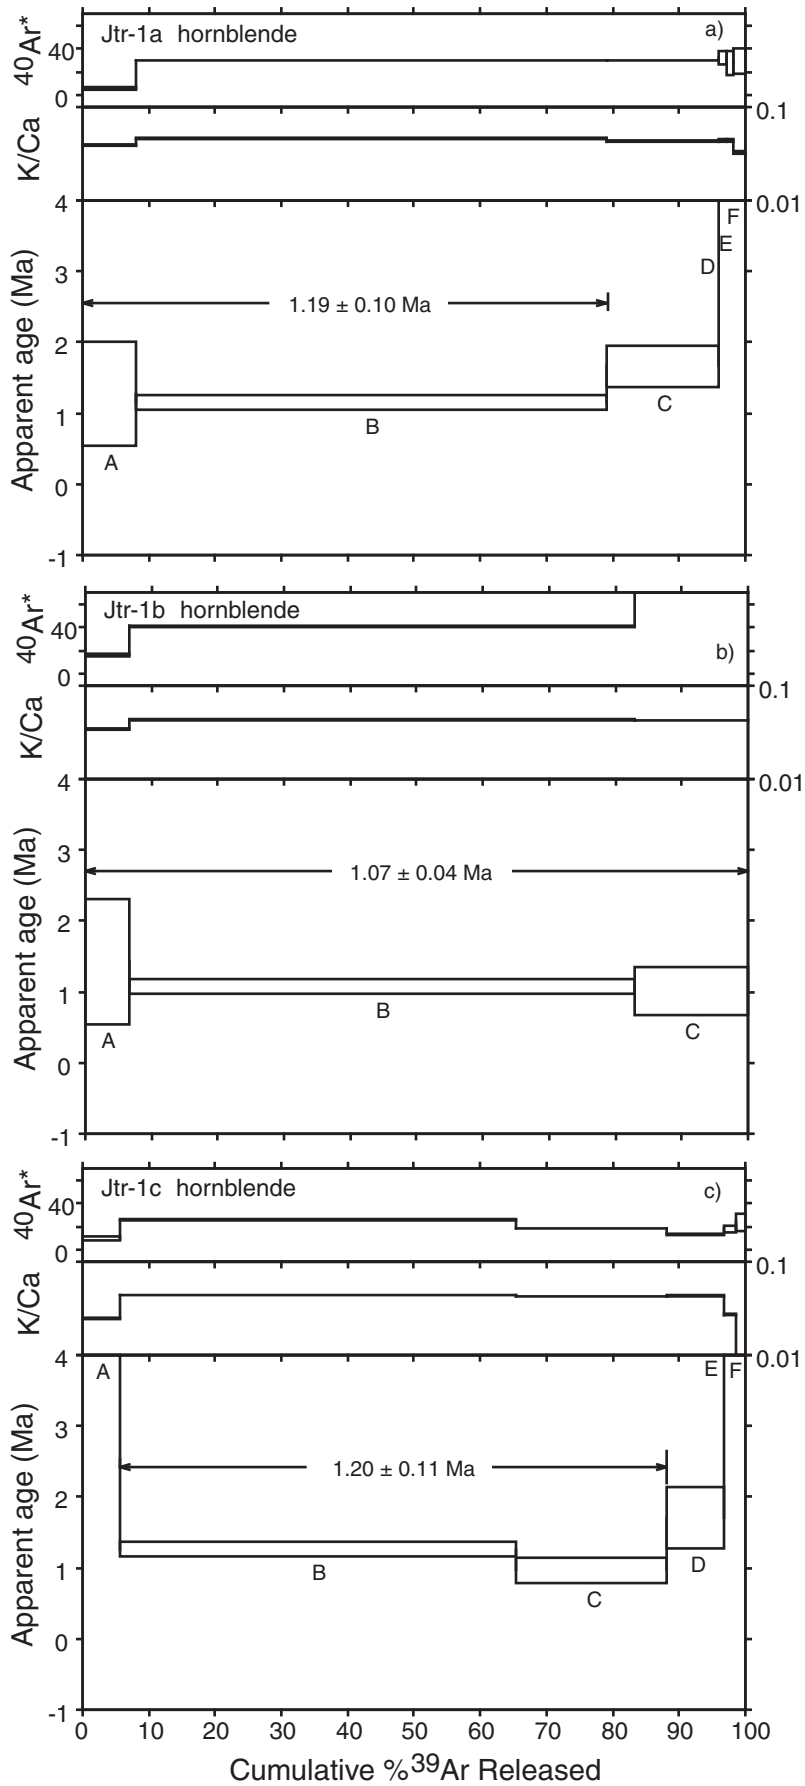

**Fig. 5.** Age spectra, K/Ca, and radiogenic yield diagrams for step-heating results of hornblende sample Jtr-1.
