# Supplementary material
Source: PubMed Central journal article supplement (PMC33129)
Supplement: pnas_081077298_2.pdf [file pnas_081077298_2.pdf]

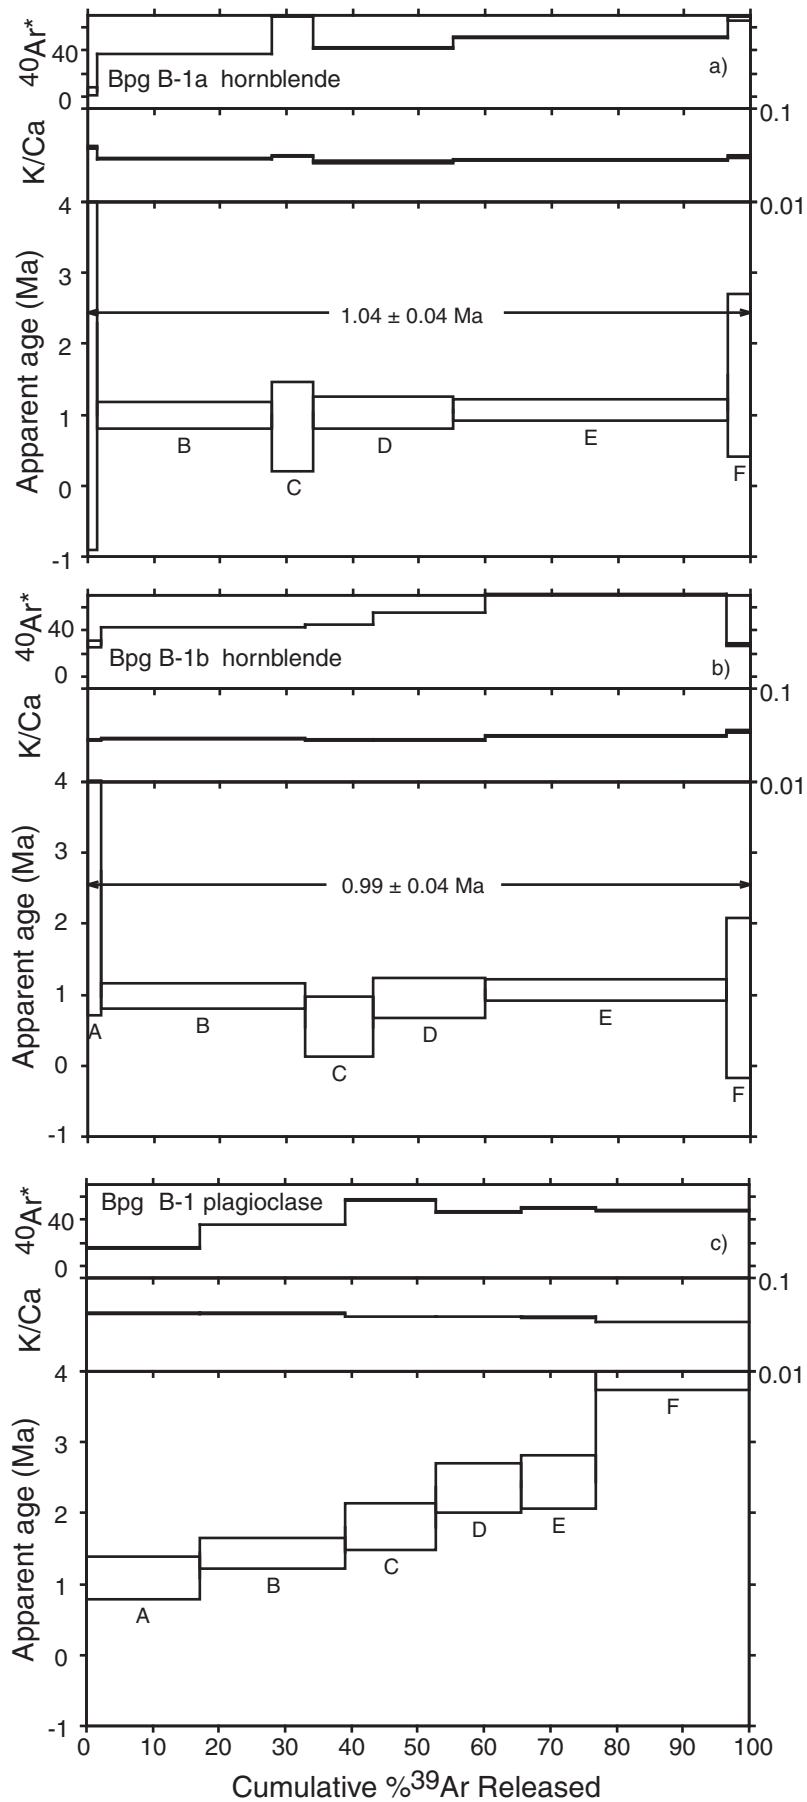

**Fig. 6.** Age spectra, K/Ca, and radiogenic yield diagrams for step-heating results of sample Bpg B-1 hornblende (a and b) and plagioclase (c).
