# Supplementary material
Source: PubMed Central journal article supplement (PMC33129)
Supplement: pnas_081077298_7.pdf [file pnas_081077298_7.pdf]

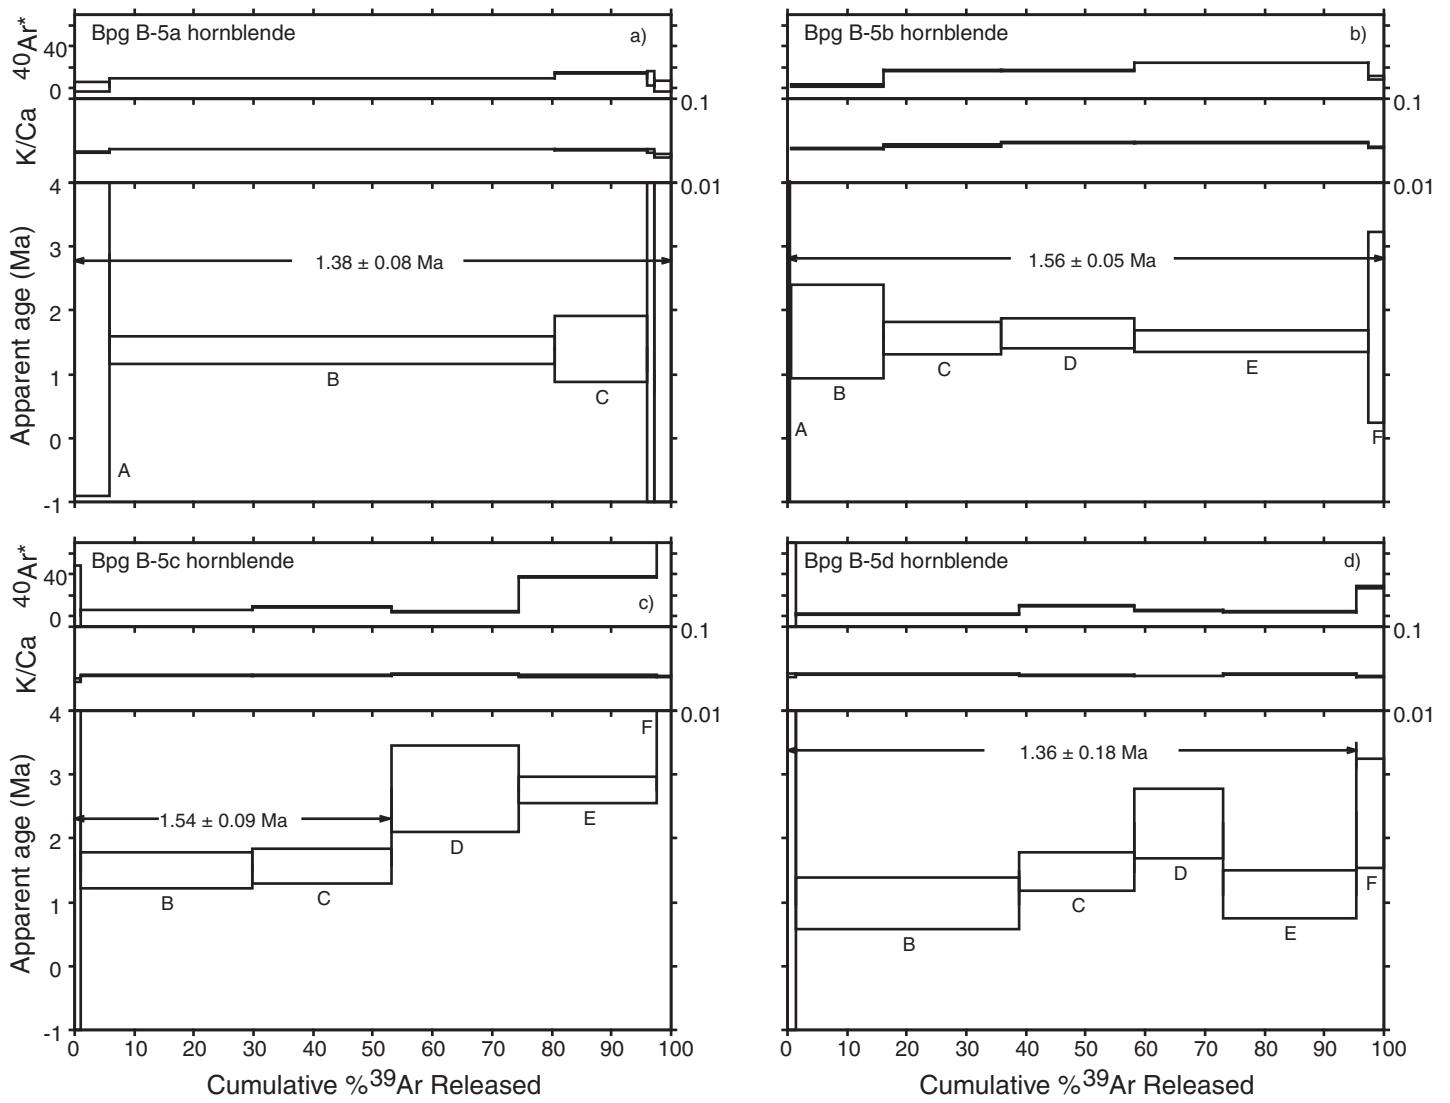

**Fig. 11.** Age spectra, K/Ca, and radiogenic yield diagrams for step-heating results of hornblende sample Bpg B-5.
